# Supplementary material for: A 3D cell printing-fabricated HepG2 liver spheroid model for high-content in situ quantification of drug-induced liver toxicity
Source: Royal Society of Chemistry journal article supplement (doi:10.1039/d1bm00749a), 2021-01-01
Supplement: d1bm00749a1.pdf [file d1bm00749a1.pdf]

## **Supplementary Information**

### **3D Cell Printing-fabricated HepG2 Liver Spheroid Model for High-content *In Situ* Quantification of Drug-induced Liver toxicity**

*Sera Hong and Joon Myong Song\**

College of Pharmacy, Seoul National University, Seoul 08826, South Korea.

\*Corresponding author. Email: [jmsong@snu.ac.kr](mailto:jmsong@snu.ac.kr)

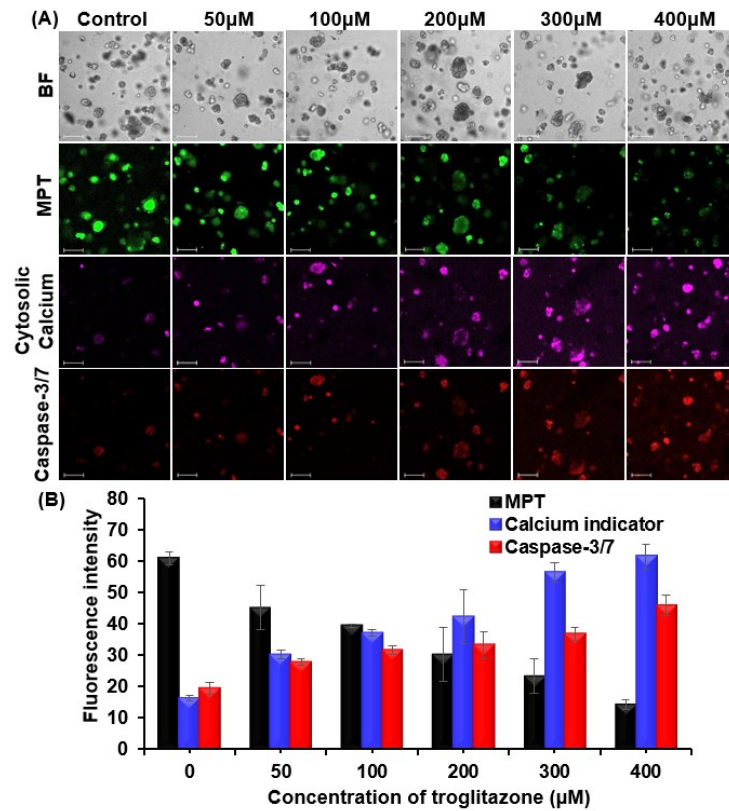

**Fig. S1.** High-content monitoring of troglitazone-induced hepatotoxicity in 3D hydrogel constructs. (A) 3D embedded HepG2 spheroids treated with 0, 50, 100, 200, 300, 400  $\mu$ M troglitazone. Scale bars, 100  $\mu$ m. The upper, upper middle, lower middle, and bottom figures correspond to confocal bright-field, MPT, cytosolic calcium, and caspase-3/7 images. (B) Fluorescence intensities were plotted as a function of drug concentration. MPT, cytosolic calcium increase, and caspase-3 formation were clearly observed.
